# Supplementary material
Source: Springer Nature journal article supplement (https://www.springermedizin.de/resource/supplementary/13075_2010_3079_MOESM2_ESM.pdf/9693690)

Control group

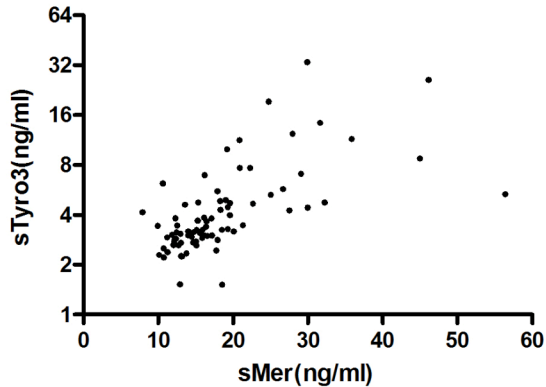

CLI group

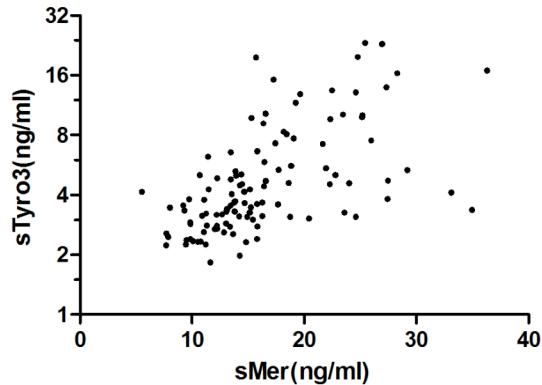

RA group

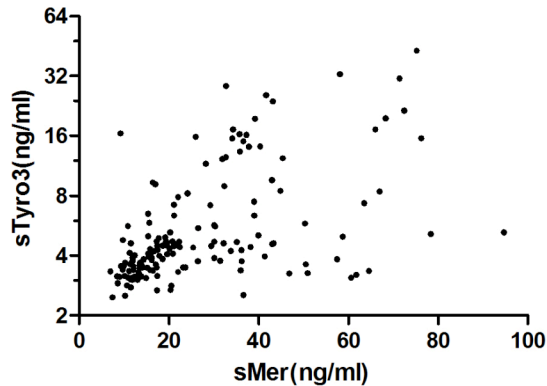

SLE group

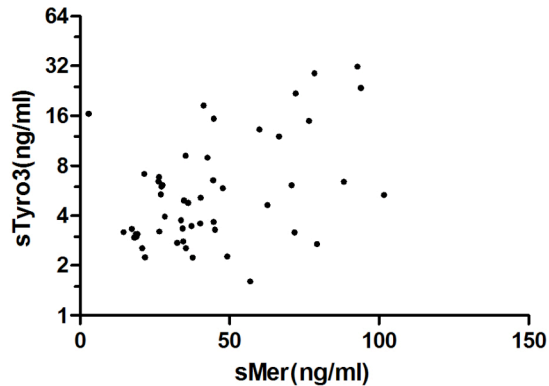

Supplement: MOESM2 [file 9693690]
